# Supplementary material
Source: MDPI journal article supplement (https://www.mdpi.com/2071-1050/11/13/3503)
Supplement: s1 [file s1]

## Sheet: Sheet1
Years		COFFEE COMPRICE			Coffee Yield	Coffee production	RAINFALL	TEMPERATURE	Real Exchange Rate	inflation CPI	TRADE OPENNESS
1961		0.895542			1833	1100	880026	315.794	0.71	6.28	0.316766
1962		0.832592			3333	2000	816463	320.783	0.71	5.27	0.286228
1963		0.805742			3333	2000	853450	324.991	0.71	-2.69	0.280944
1964		1.00976			5000	3000	864541	318.823	0.71	0.86	0.317793
1965		1.00035			5000	3000	880837	318.901	0.71	4.1	0.345378
1966		0.928725			6667	4000	860730	320.35	0.71	9.69	0.354991
1967		0.864208			2853	1712	697305	317.963	0.71	-3.73	0.366691
1968		0.867			3933	2360	692181	320.4	0.71	-0.48	0.317446
1969		0.876725			7960	4776	728604	327.362	0.71	10.16	0.351379
1970		1.14662			5002	2826	723638	322.427	0.71	13.76	0.389213
1971		0.991875			5000	3600	717140	316.945	0.71	16	0.503086
1972		1.10959			4995	4171	667741	323.011	0.66	3.46	0.495483
1973		1.37345			5000	2300	665449	326.677	0.66	5.4	0.659736
1974		1.45153			5000	2400	713834	315.257	0.63	12.67	0.473131
1975		1.44213			5000	3000	697121	314.633	0.62	33.96	0.318232
1976		3.14666			5000	3000	690785	316.656	0.63	24.3	0.408269
1977		5.16887			5000	3100	708903	317.92	0.64	15.09	0.46714
1978		3.58999			5000	3100	657215	318.345	0.64	21.71	0.4887
1979		3.82613			5000	3200	750004	323.201	0.6	11.71	0.61137
1980		3.46628			5000	3500	748731	322.514	0.55	9.97	0.738024
1981		2.86855			5000	3000	659713	321.315	0.62	20.81	0.116278
1982		3.08756			5000	3000	656010	322.321	0.67	7.7	0.095034
1983		2.91126			5000	3000	622020	324.623	0.72	23.21	0.0883964
1984		3.18866			5000	4000	720380	326.215	0.77	17.82	0.0886143
1985		3.23079			5000	6000	745927	323.873	0.89	7.44	0.0934329
1986		4.29258			5000	1200	768889	324.093	1.75	5.72	0.0723605
1987		2.50498			5000	1500	793505	331.165	4.02	11.29	0.235453
1988		3.03371			5233	1570	797097	324.793	4.54	54.51	0.239401
1989		2.38731			7559	2570	816825	317.977	7.36	50.47	0.375244
1990		1.9722			8824	3030	829970	328.506	8.04	7.36	0.581588
1991		1.87339			9143	3200	871419	324.654	9.91	13.01	0.795178
1992		1.41192			9389	3380	908656	319.356	17.3	44.59	12.8526
1993		1.5602			9676	3580	960617	324.126	22.07	57.17	1.39866
1994		3.30764			9300	3720	965668	320.714	22	57.03	1.33907
1995		3.33232			7362	3090	1.02147e+06	324.181	21.9	72.84	6.06164
1996		2.69421			9604	3780	1.03146e+06	325.393	21.88	29.27	6.37344
1997		4.16794			9084	3700	1.02943e+06	324.936	21.89	8.53	6.91134
1998		2.98132			8303	3700	1.04265e+06	331.642	21.89	10	5.11202
1999		2.29058			11981	3750	1.04763e+06	324.921	92.34	6.62	6.57141
2000		1.91967			12006	3830	1.08928e+06	322.156	101.7	6.93	8.90321
2001		1.37312			11994	3850	1.12467e+06	323.918	111.23	18.87	9.03693
2002		1.35661			12312	4100	1.128e+06	326.719	120.58	12.88	7.51811
2003		1.41539			12316	4360	1.15123e+06	328.549	129.22	14.03	10.8225
2004		1.77398			13017	4660	1.16324e+06	328.098	132.89	15	12.4908
2005		2.53217			13597	4990	1.14404e+06	329.781	131.27	17.86	17.8801
2006		2.5221			14394	5340	1.12283e+06	328.861	128.65	8.24	17.5106
2007		2.7237			12600	2520	1.13157e+06	329.118	125.81	5.38	19.2695
2008		3.0816			14286	3000	1.12841e+06	325.619	118.55	11.58	22.7464
2009		3.17114			11333	2040	1.13192e+06	334.245	148.9	11.54	0.00663705
2010		4.3201			12000	2400	1.07367e+06	333.239	150.3	13.72	0.0303514
2011		5.97614			12381	2600	1.07272e+06	328.559	153.86	10.84	0.0397674
2012		4.11096			13333	3000	1.08439e+06	326.59	157.5	12.22	0.0376114
2013		3.07599			11053	2100	1.06969e+06	323.702	157.31	8.48	0.0373743
2014		4.42379			13323	3589	1.06849e+06	323.706	158.55	8.06	0.0355213
2015		3.52607			13528	3604	1.13518e+06	323.705	192.44	9.02	0.0364474

## Sheet: Sheet2
Years		COFFEE COMPRICE			Coffee Yield	Coffee production	RAINFALL	TEMPERATURE	Real Exchange Rate	inflation CPI	TRADE OPENNESS
1961		0.895542			1833	1100	880026	315.794	0.71	6.28	0.316766
1962		0.832592			3333	2000	816463	320.783	0.71	5.27	0.286228
1963		0.805742			3333	2000	853450	324.991	0.71	-2.69	0.280944
1964		1.00976			5000	3000	864541	318.823	0.71	0.86	0.317793
1965		1.00035			5000	3000	880837	318.901	0.71	4.1	0.345378
1966		0.928725			6667	4000	860730	320.35	0.71	9.69	0.354991
1967		0.864208			2853	1712	697305	317.963	0.71	-3.73	0.366691
1968		0.867			3933	2360	692181	320.4	0.71	-0.48	0.317446
1969		0.876725			7960	4776	728604	327.362	0.71	10.16	0.351379
1970		1.14662			5002	2826	723638	322.427	0.71	13.76	0.389213
1971		0.991875			5000	3600	717140	316.945	0.71	16	0.503086
1972		1.10959			4995	4171	667741	323.011	0.66	3.46	0.495483
1973		1.37345			5000	2300	665449	326.677	0.66	5.4	0.659736
1974		1.45153			5000	2400	713834	315.257	0.63	12.67	0.473131
1975		1.44213			5000	3000	697121	314.633	0.62	33.96	0.318232
1976		3.14666			5000	3000	690785	316.656	0.63	24.3	0.408269
1977		5.16887			5000	3100	708903	317.92	0.64	15.09	0.46714
1978		3.58999			5000	3100	657215	318.345	0.64	21.71	0.4887
1979		3.82613			5000	3200	750004	323.201	0.6	11.71	0.61137
1980		3.46628			5000	3500	748731	322.514	0.55	9.97	0.738024
1981		2.86855			5000	3000	659713	321.315	0.62	20.81	0.116278
1982		3.08756			5000	3000	656010	322.321	0.67	7.7	0.095034
1983		2.91126			5000	3000	622020	324.623	0.72	23.21	0.0883964
1984		3.18866			5000	4000	720380	326.215	0.77	17.82	0.0886143
1985		3.23079			5000	6000	745927	323.873	0.89	7.44	0.0934329
1986		4.29258			5000	1200	768889	324.093	1.75	5.72	0.0723605
1987		2.50498			5000	1500	793505	331.165	4.02	11.29	0.235453
1988		3.03371			5233	1570	797097	324.793	4.54	54.51	0.239401
1989		2.38731			7559	2570	816825	317.977	7.36	50.47	0.375244
1990		1.9722			8824	3030	829970	328.506	8.04	7.36	0.581588
1991		1.87339			9143	3200	871419	324.654	9.91	13.01	0.795178
1992		1.41192			9389	3380	908656	319.356	17.3	44.59	12.8526
1993		1.5602			9676	3580	960617	324.126	22.07	57.17	1.39866
1994		3.30764			9300	3720	965668	320.714	22	57.03	1.33907
1995		3.33232			7362	3090	1.02147e+06	324.181	21.9	72.84	6.06164
1996		2.69421			9604	3780	1.03146e+06	325.393	21.88	29.27	6.37344
1997		4.16794			9084	3700	1.02943e+06	324.936	21.89	8.53	6.91134
1998		2.98132			8303	3700	1.04265e+06	331.642	21.89	10	5.11202
1999		2.29058			11981	3750	1.04763e+06	324.921	92.34	6.62	6.57141
2000		1.91967			12006	3830	1.08928e+06	322.156	101.7	6.93	8.90321
2001		1.37312			11994	3850	1.12467e+06	323.918	111.23	18.87	9.03693
2002		1.35661			12312	4100	1.128e+06	326.719	120.58	12.88	7.51811
2003		1.41539			12316	4360	1.15123e+06	328.549	129.22	14.03	10.8225
2004		1.77398			13017	4660	1.16324e+06	328.098	132.89	15	12.4908
2005		2.53217			13597	4990	1.14404e+06	329.781	131.27	17.86	17.8801
2006		2.5221			14394	5340	1.12283e+06	328.861	128.65	8.24	17.5106
2007		2.7237			12600	2520	1.13157e+06	329.118	125.81	5.38	19.2695
2008		3.0816			14286	3000	1.12841e+06	325.619	118.55	11.58	22.7464
2009		3.17114			11333	2040	1.13192e+06	334.245	148.9	11.54	0.00663705
2010		4.3201			12000	2400	1.07367e+06	333.239	150.3	13.72	0.0303514
2011		5.97614			12381	2600	1.07272e+06	328.559	153.86	10.84	0.0397674
2012		4.11096			13333	3000	1.08439e+06	326.59	157.5	12.22	0.0376114
2013		3.07599			11053	2100	1.06969e+06	323.702	157.31	8.48	0.0373743
2014		4.42379			13323	3589	1.06849e+06	323.706	158.55	8.06	0.0355213
2015		3.52607			13528	3604	1.13518e+06	323.705	192.44	9.02	0.0364474
